## Correction: Bioinformatics and Multiepitope DNA Immunization to Design Rational Snake Antivenom

Simon C. Wagstaff, Gavin D. Laing, R. David G. Theakston, Christina Papaspyridis, Robert A. Harrison

Correction for:

Wagstaff SC, Laing GD, Theakston RDG, Papaspyridis C, Harrison RA (2006) Bioinformatics and multiepitope DNA immunization to design rational snake antivenom. PLoS Med 3(6): e184. doi:10.1371/journal.pmed.0030184

In the Supporting Information section of this paper, Figure S1 and Figure S2 were incorrectly linked. Figure S1 and Figure S2 labeled and in the order originally intended are provided here.

Figure S1. Comparative Sequence Analysis of Full-Length PI-PIII SVMP Isoforms

Found at doi:10.1371/journal.pmed.0050209.sg001 (48 KB PDF).

Figure S2. Composition of the *E. ocellatus* Venom Gland Transcriptome

Found at doi:10.1371/journal.pmed.0050209.sg002 (32 KB PDF).

Citation: Wagstaff SC, Laing GD, Theakston RDG, Papaspyridis C, Harrison RA (2008) Correction: Bioinformatics and multiepitope DNA immunization to design rational snake antivenom. PLoS Med 5(10): e209. doi:10.1371/journal.pmed.0050209

Received: August 26, 2008; Accepted: August 27, 2008; Published: October 28, 2008.

Copyright: © 2008 Wagstaff et al. This is an open-access article distributed under the terms of the Creative Commons Attribution License, which permits unrestricted use, distribution, and reproduction in any medium, provided the original author and source are credited.
